# Supplementary material for: Coronary artery disease as an independent predictor of survival in patients with type 2 diabetes and Charcot neuro-osteoarthropathy
Source: Springer Nature journal article supplement (doi:10.1007/s00592-014-0669-9), 2014-10-25
Supplement: MOESM1 [file 8615114]

**Supplement**

1. Questionnaire for interview with patient and completion of data

| **Name:** |  | | | | | | | | | | | | | |
| --- | --- | --- | --- | --- | --- | --- | --- | --- | --- | --- | --- | --- | --- | --- |
| **Date of birth** |  | | | | | | | | Age: | | | |  | |
| **IsynetNr.:** |  | | | | | | | | | | | | | |
| **Sex:** |  | | | | | | | | | | | | | |
| **Profession** |  | | | | | | | | | | | | | |
| **Height:** |  | | | | | | | | | | | | | |
| **Weight:** |  | | Course of weight | | | | | | | |  | | | |
| **Type and duration of diabetes** |  | | | | | HbA1c | | | | | | |  | |
| **Notes:** | | | | | | Alcohol: | | | | | | |  | |
| Nicotin: | | | | | | |  | |
| **Comorbidity:**  (at time of initial diagnosis of CN) | PAD | | |  | | CHD: | | | | | | | |  |
| Neuropathy: | | |  | | Stroke: | | | | | | | |  |
| Nephropathy: | | |  | |  | | | | | | | |  |
| Retinopathy: | | |  | |  | | | | | | | |  |
| History of CN: | FD right foot:  FD left foot: | | | | | | | | | | | | | |
| **Initial diagnosis:** | Right: | |  | | | | Place of diagnosis (e.g. hospital) | | | | |  | | |
| Left: | |  | | | | Confounding conditions | | | | |  | | |
| Sanders stage **(I-V):** | Right: | |  | | | | Left: | | | |  | | | |
| **Levin stage**  **(I-IV):** | Right: | |  | | | | Left: | | | |  | | | |
| **Radiographs (type, date):** | Right: | |  | | | | Left: | | | |  | | | |
| **Foot complications at onset of CN:**    (When? Where? Which? Localisation?) | Amputation: |  | | | | | | | |  | | | | |
| Minor: | Yes / No | | | | | | | | Yes / No | | | | |
| Major: | Yes / No | | | | | | | | Yes / No | | | | |
| Ulcer: |  | | | | | | | |  | | | | |
| **Foot complications at follow-up:**  **Date:** | Amputation: |  | | | | | | | |  | | | | |
| Minor: | Yes / No | | | | | | | | Yes / No | | | | |
| Major: | Yes / No | | | | | | | | Yes / No | | | | |
| Ulcer: |  | | | | | | | |  | | | | |
| **Footwear**  **(before onset of CN)** Internal supply:Yes / No | Off the shelf footwear: | | |  | | | | | | | | | | |
| Medical grade footwear | | |  | | | | | | | | | | |
| Non-molded orthosis | | |  | | | | | | | | | | |
| Custom-molded orthosis | | |  | | | | | | | | | | |
| TCC:  (total contact cast) | | |  | | | | | | | | | | |
| **Footwear during acute CN**  Internal supply  Yes / No |  | | | | | | | | | | | | | |
| **Footwear after CN:** Internal supplyYes / No |  | | | | | | | | | | | | | |
| **Treatment at DZM from – to:** |  | | | | | | | | | | | | | |
| **No. of outpatient contacts** |  | | | | | | | | | | | | | |
| **GP, other specialists** |  | | | | | | |  | | | | | | |
| **Laboratory values:**  (at onset of CN) | CRP:  LKO:  (4000-10000/µl)  Hb: | | | | Creatinin:  (0,60-1,30mg/dl)  GOT:  (1-35U/l)  GPT:  (1-35U/l)  GGT:  (1-40U/l) | | | | | | HbA1c: | | | |
| **Date and cause of death** |  | | | | | | | | | | | | | |

1. Questionnaire for the patients’ general practitioner

**Demographic data:**

| Name: |  |
| --- | --- |
| Street |  |
| City: |  |
| Date of birth: |  |

Treatment at Diabetes Zentrum Mergentheim: from _______ to _______

Charcot foot: Ο right Ο left

Date of initial diagnosis (and place): _____________________

| Hast the wound on the affected foot fully recovered? | Ο Yes | | Ο No | | |
| --- | --- | --- | --- | --- | --- |
| Occurence of new wounds?: | Ο Yes | | Ο No | | |
| If yes, please specify | - plantar   O Toes, Nr: ___  O MTB, Nr: ___  O tarsus  O heel | | Ο other | | |
| Has the patient had any amputations on the foot?: | - Yes | | Ο No | | |
| If yes, please specify | - Amputation of toes:   O D1, Date: _____  O D2, Date: _____  O D3, Date: _____  O D4, Date: _____  O D5, Date: _____   - Bone resection:   O Strahl1, Date: _____  O Strahl2, Date: _____  O Strahl3, Date: _____  O Strahl4, Date: _____  O Strahl5, Date: _____   - Amputation of fore foot,   Date: _____  Ο Lower leg amputation,  Date: ____  Ο Upper leg amputation,  Date: _____  Ο other  Date: _____ | | | | |
| Have concomitant diseases/comorbidities been diagnosed? | Ο PAD  Ο Neuropathy  Ο Nephropathy  Ο Retinopathy  Ο CHD  Ο Stroke | | | | |
| Has the patient died?:  (Please complete questionnaire even in case patient has died). | Ο Yes | Ο No | | | Ο unknown |
| If yes, please specify | Date | | | | |
| Cause | | | | |
| Current HbA1c: |  | | | | |
| Height and weight |  | | |  | |
